# Supplementary material for: Signage Interventions for Stair Climbing at Work: More than 700,000 Reasons for Caution
Source: MDPI journal article supplement (doi:10.3390/ijerph16193782), 2019-10-08
Supplement: s1 [file s1]

Supplementary File 1: Summary of building characteristics, baseline pedestrian behaviour, and stair climbing campaigns in the UK.

| Variable                               | St James     | Civic Centre | Standard              | Ferrer's Court | Town Hall    | Sutton New | Christchurch | Chamber of   | Broadgate    |
|----------------------------------------|--------------|--------------|-----------------------|----------------|--------------|------------|--------------|--------------|--------------|
|                                        | House        |              | Court                 |                |              | Road       | House        | Commerce     | House        |
| Location                               | Dudley       | Coventry     | Nottingham            | Nottingham     | Walsall      | Birmingham | Coventry     | Birmingham   | Coventry     |
| Employees                              | government   | government   | health care           | commerce       | government   | government | government   | commerce     | government   |
| Elevators                              | 1            | 1            | 1                     | 2              | 2            | 2          | 2            | 2            | 2            |
| Floors                                 | 3            | 4            | 5                     | 3 <sup>a</sup> | 4            | 4          | 5            | 6            | 6            |
|                                        |              |              |                       |                |              |            |              |              |              |
| Baseline Stair up                      | 63.2%        | 63.1%        | 35.4%                 | 52.4%          | 32.8%        | 43.5%      | 56.9%        | 39.9%        | 27.9%        |
| Baseline Stair down                    | 73.1%        | 80.2%        | 65.1%                 | 66.7%          | 64.5%        | 61.9%      | 82.3%        | 62.9%        | 60.7%        |
| Median traffic up.min <sup>-1</sup>    | 2            | 2            | 3                     | 3              | 4            | 3          | 3            | 2            | 4            |
| (IQR, Q1:Q3) <sup>b</sup>              | (1:4)        | (1:3)        | (2:5)                 | (2:5)          | (2:5)        | (2:5)      | (2:5)        | (1:4)        | (2:6)        |
| Median traffic down .min <sup>-1</sup> | 2            | 2            | 2                     | 3              | 4            | 2          | 3            | 2            | 3            |
| (IQR, Q1:Q3)                           | (1:4)        | (1:3)        | (1:3)                 | (2:5)          | (2:6)        | (1:3)      | (2:4)        | (1:3)        | (2:4)        |
|                                        |              |              |                       |                |              |            |              |              |              |
| First campaign <sup>c</sup>            | Calories     | Calories     | Calories <sup>d</sup> | Calories       | Heart health | Fitness    | Heart health | Fitness      | Calories     |
| Second campaign                        | Heart health | Fitness      | Calories              | Calories       | Calories     | Calories   | Calories     | Heart health | Heart health |
| Duration of phases                     | 4 weeks      | 3 weeks      | 4 weeks               | 4 weeks        | 4 weeks      | 3 weeks    | 3 weeks      | 3 weeks      | 3 weeks      |

a; the distance from the ground to the first floor (7.2 m) was double the height of the other sites, and the building has been coded as three floors to reflect the increased height of the climb. b; IQR = Interquartile range, Q = quartile. c; see below for the full wording of the main messages and prompts (c.f. Thomas et al., (2015). d: For Nottingham, a message at the choice-point at the bottom of the stairs was supplemented for the second campaign with messages on subsequent floors describing the calories used to reach that floor from the ground (c.f. Lewis & Eves, 2011).

Calories main poster (A3)

## Stair climbing always burns calories

One flight of stairs uses about 3.2 calories but 10 flights a day would use 32 calories.

Over a year that adds up to 11,700 calories; that's almost 3½ lbs of fat.



The illustration shows a white line-art figure of a person climbing a set of stairs. A red heart is positioned on the figure's chest, with a yellow glow around it. The figure is carrying a briefcase in its right hand.

**U** UNIVERSITY OF BIRMINGHAM **B** **Heart of Birmingham Teaching Primary Care Trust** **NHS** **Health Scotland** **healthy living**

Calories prompt at lift button (A4)

## Stair climbing always burns calories

### Why not take the stairs?



The illustration shows a white line-art figure of a person climbing a set of stairs. A red heart is positioned on the figure's chest, with a yellow glow around it. The figure is carrying a briefcase in its right hand.

**U** UNIVERSITY OF BIRMINGHAM **B** **Heart of Birmingham Teaching Primary Care Trust** **NHS** **Health Scotland** **healthy living**

Heart health main poster (A3)

## Stair climbing protects your heart

Doctors have found that 7 minutes of stair climbing a day halves your risk of a heart attack over a 10 year period.

There are 1440 minutes in a day. Can you spare 7 to live longer?



The illustration shows a white line-art figure of a person climbing a set of stairs. A red heart is positioned on the figure's chest, with a yellow glow around it. The figure is carrying a briefcase in their right hand.

**NHS** Health Scotland  
healthyliving

**U** UNIVERSITY OF BIRMINGHAM **B** Heart of Birmingham Teaching **NHS** Primary Care Trust

Heart health prompt at lift button (A4)

## Stair climbing protects your heart

### Why not take the stairs?



The illustration is similar to the one on the A3 poster, showing a white line-art figure climbing stairs with a red heart on their chest and a yellow glow. The figure is carrying a briefcase.

**NHS** Health Scotland  
healthyliving

**U** UNIVERSITY OF BIRMINGHAM **B** Heart of Birmingham Teaching **NHS** Primary Care Trust

Fitness main poster (A3)

**Stair climbing helps keep you fit**

**Climb two flights of stairs in one go. If you feel slightly out of breath, that's because you've started to get fitter.**

**Build up slowly for fitness, add 1 extra flight each week.**



The illustration shows a white line-art figure of a person climbing a set of stairs. A red heart is positioned on the figure's chest, with a yellow glow effect around it. The figure is carrying a briefcase in their right hand and has their left arm raised.

**U** UNIVERSITY OF BIRMINGHAM **B**

healthyliving

NHS Health Scotland

Heart of Birmingham Teaching Primary Care Trust

Fitness prompt at lift button (A4)

**Stair climbing helps you keep fit**

**Why not take the stairs?**



The illustration shows a white line-art figure of a person climbing a set of stairs. A red heart is positioned on the figure's chest, with a yellow glow effect around it. The figure is carrying a briefcase in their right hand and has their left arm raised.

U UNIVERSITY OF BIRMINGHAM B

healthyliving

NHS Health Scotland

Heart of Birmingham Teaching Primary Care Trust

Nottingham message at choice-point (A3)

Stair climbing always  
burns calories

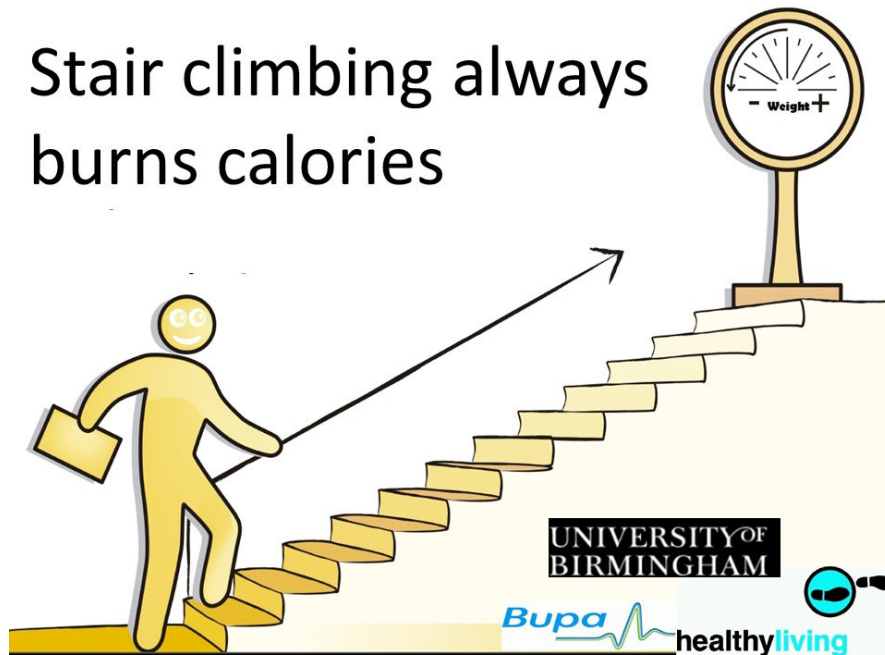

Nottingham message for third floor (A4)

Well done stair climbers  
If you've climbed to here  
from the ground, you've  
just burnt about a 9<sup>th</sup> of the  
daily calories required to  
avoid weight gain.

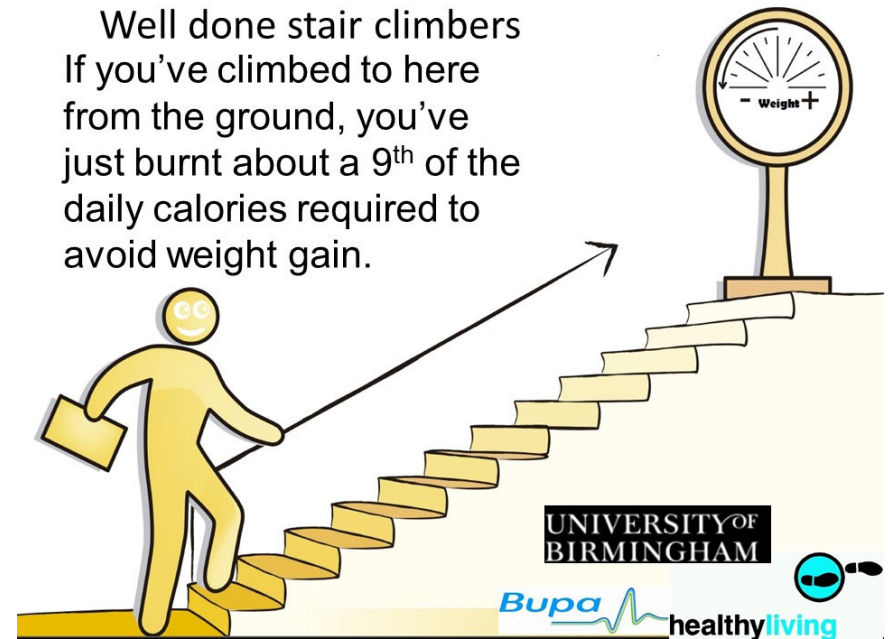

Supplementary File 2: Summary of building characteristics, baseline pedestrian behaviour, and stair climbing campaigns for Barcelona.

| Variable                                 | Almirall                  | Volkswagen <sup>a</sup>   | Volkswagen                | Roche <sup>b</sup> Entrance | Roche Canteen             |
|------------------------------------------|---------------------------|---------------------------|---------------------------|-----------------------------|---------------------------|
|                                          |                           | Left                      | Right                     |                             |                           |
| Employees                                | commerce                  | commerce                  | commerce                  | commerce                    | commerce                  |
| Elevators                                | 1                         | 2                         | 2                         | 2                           | 2                         |
| Floors                                   | 3                         | 3                         | 3                         | 3                           | 4                         |
| Baseline Stair up                        | 34.5%                     | 42.1%                     | 37.4%                     | 55.9%                       | 50.9%                     |
| Baseline Stair down                      | 53.2%                     | 49.2%                     | 47.4%                     | 69.9%                       | 67.1%                     |
| Median traffic up.30 min <sup>-1</sup>   | 8                         | 17                        | 22                        | 12                          | 15                        |
| (IQR, Q1:Q3)                             | (4:14)                    | (9:24)                    | (12:35)                   | (6:19)                      | (7:29)                    |
| Median traffic down.30 min <sup>-1</sup> | 13                        | 17                        | 20                        | 18                          | 20                        |
| (IQR, Q1:Q3)                             | (8:18)                    | (10:23)                   | (12:32)                   | (11:25)                     | (12:28)                   |
| First campaign                           | Heart health <sup>d</sup> | Heart health <sup>d</sup> | Heart health <sup>d</sup> | Heart health <sup>c</sup>   | Heart health <sup>c</sup> |
| Second campaign                          | Fitness <sup>e</sup>      | Heart health <sup>c</sup> | Heart health <sup>c</sup> | Heart health <sup>d</sup>   | Heart health <sup>d</sup> |

a For Volkswagen, one staircase/elevator choice-point provided access to the left side of the building and one staircase/elevator choice-point access to the right. b At Roche, one staircase/elevator choice-point was at the entrance floor of the building and one at the canteen and access to the smoking area, a floor below. c Translation into Spanish of the Heart Health message used in the UK. d Catalan message for effects of stair climbing on heart health and cholesterol. e Catalan message for effects of stair climbing on fitness.

c) Translation of UK message into Spanish (A3)

## Subir escaleras protege tu corazón

Subir escaleras **7** minutos al día reduce a la mitad el riesgo de sufrir un ataque al corazón.

Un día tiene **1.440** minutos.  
¿Puedes dedicar **7** a vivir más?

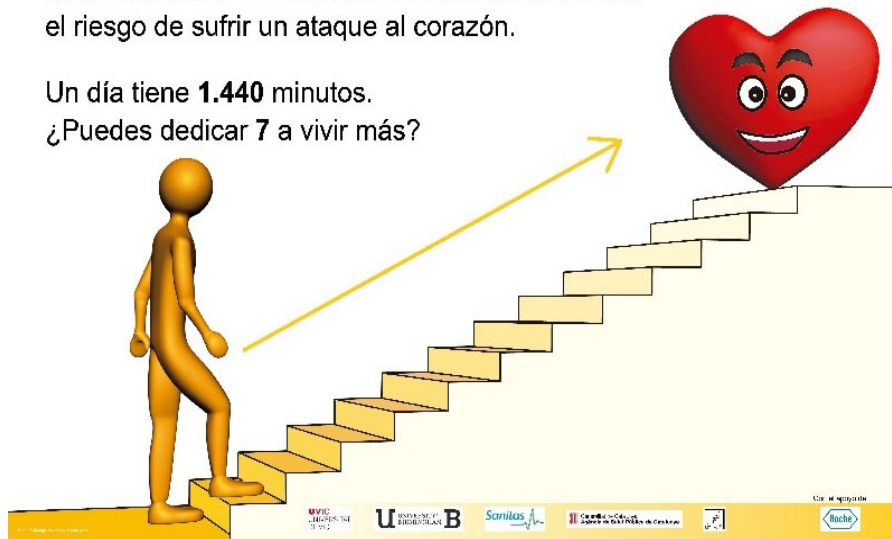

### Stairwell messages (A4)

For each campaign, messages were installed in the stairwell between floors using the same poster background.

Floor 1: Climbing stairs helps lower your blood pressure

Floor 2: Keep climbing stairs. It also helps reduce cholesterol

Floor 3: Climbing stairs for 7 min during the day is very good for your heart. It also reduces abdominal fat

d) Spanish heart health message (A3)

## Subir escaleras protege tu corazón

Subir escaleras **5** minutos a lo largo del día te ayuda a reducir los niveles de colesterol

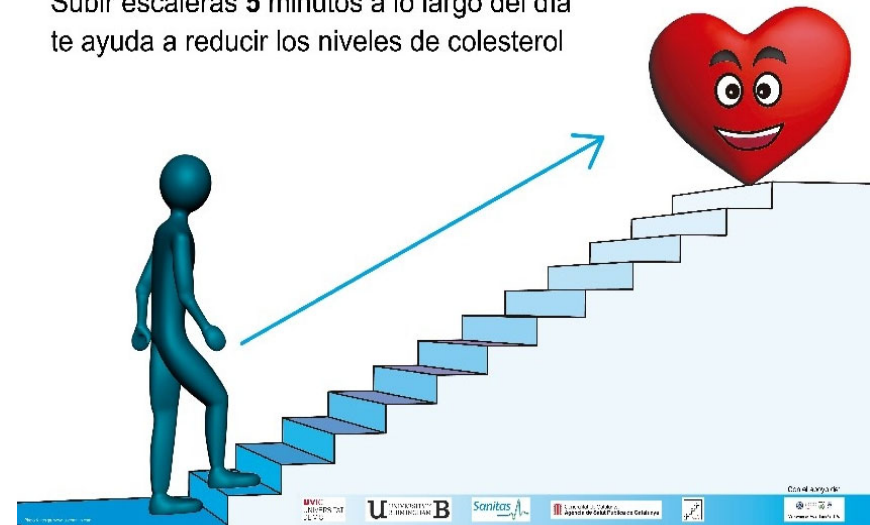

### Main message translation:

Stair climbing protects your heart

5 min of stair climbing a day can reduce your cholesterol levels.

### Stairwell messages (A4)

The same stairwell messages were employed.



e) Spanish fitness message (A3)

## Ponte en forma subiendo escaleras

Subir escaleras a ritmo ligero durante **5 minutos** al día mejora tu resistencia cardiorespiratoria.

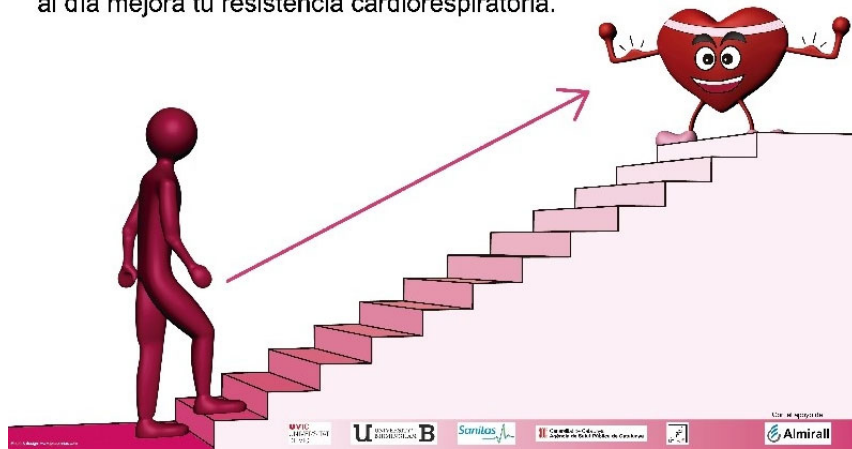

### Translation:

Get in shape climbing stairs.

Climbing stairs at a moderate pace for five minutes a day improves your cardiorespiratory endurance.

### Stairwell messages on the same poster background (A4)

Floor 1: Keep improving your cardiorespiratory stamina by climbing stairs.

Floor 2: Train your muscles. Climbing stairs also helps you tone your legs and buttocks.

Floor 3: Climbing stairs at work improves your fitness.



### **Supplementary File 3: Effects of pedestrian movement on stair use in the analyses.**

To understand the effects of pedestrian movement, it is helpful to appreciate that employees within a building are making a journey from their start point to their destination. Stairs and elevators are simply hurdles to be overcome on this journey (Eves 2008, 2010). Typically, pedestrians minimize the energetic and temporal costs of their journey by selecting the shortest route (Eves et al., 2009; Gärling & Gärling, 1988; Webb & Eves, 2007). During walking, pedestrians naturally minimize energetic costs. They adopt a step width, step length, and stride frequency for walking, all of which minimize the total metabolic cost for completion of the journey (Srinivasan, 2009). Stair climbing entails at least twice the energetic cost of stair descent as body mass must be carried upstairs under the influence of gravity (Teh & Azis, 2002). Choice of an elevator minimizes the energetic costs of the journey, more so for ascent than descent. Time of the journey is also important to employees at work (Blake et al., 2008; Kerr et al., 2001a; Olander & Eves, 2011a; Thomas et al., 2015) and for pedestrians in public access settings (Eves et al., 2008; Kerr et al., 2001b); time pressure can override energy minimization (Eves et al., 2008). An elevator that is not readily available may entail increased temporal costs, and the stairs represent a quicker route to the destination (Olander & Eves, 2011a).

In the UK, ascending pedestrian traffic each minute was associated with reductions in both stair climbing and descent. This apparent consistency of effects on both directions of stair travel is misleading. For ascent from the ground floor, employees at the choice-point were exposed to the influences of other ascending employees. A waiting colleague signals that the elevator has been summoned, and joining this colleague could minimize temporal and energetic costs incurred by climbing, as well as providing an opportunity for social interaction (Eves et al., 2006). Descending employees, however, only encounter the ascending traffic at the end of their journey, (i.e., after their choice). Employees descending to the choice-point from higher floors could only be influenced by ascending traffic at locations remote from the choice-point. The effects on descent reflect aggregated behavior over a number of choice-points. If one assumes that ascending elevator users make the elevator more available on floors above the ground, effects on descending employees can be explained. Elevators signal their direction of travel and the floor at which they are located. An employee descending from a floor above may wait for an ascending elevator to arrive. Once again, temporal and energetic costs would be minimized for that individual.

In the UK, descending traffic was associated with an increase in stair use, irrespective of direction. As noted above, effects on descending employees can only reflect aggregate behavior over a number of choice-points remote from the monitored site. One simple explanation for the consistency is that descending traffic represents a proxy for 'busyness' of the building (see below). A descending employee arriving at the choice-point may see that the elevator is elsewhere in the building and choose the stairs as a quicker option.

Minute-by-minute measures of momentary traffic in the UK allowed estimates of the influences of other employees arriving at the choice-point on individual choice. For the Barcelona data, measures every 30 min provided by Solva (NL) lacked this granularity. Instead, aggregates over periods of 30 min represent overall movement within the building (i.e., 'busyness'). As a result, effects of 'busyness' in analyses for Barcelona would not be expected to mirror effects of momentary traffic tested in the UK.

Generally, 'busyness' had the opposite effect to momentary pedestrian traffic, increasing both stair climbing and descent. The more people in the building, the more likely the occupants will choose the stairs (Eves et al., 2012a, Olander & Eves, 2011a). When a building is busy, waiting times for the elevator increase, and stairs may represent the quicker route to the destination (Olander & Eves, 2011a). Increased movement throughout a building will reduce the availability of an elevator at each choice-point; stair use may be a quicker option that minimizes temporal costs despite the increased energetic cost. In Barcelona, only descending elevator traffic reduced stair climbing. Measures over 30 min will have aggregated a number of different descending elevator journeys to the choice-point; potential climbers in this time period could encounter many elevators in transit to the choice-point. The simplest explanation for a reduction in climbing is that ascending employees are willing to wait for approaching elevators that signal their approach to the choice-point. As noted earlier, stair climbing requires at least twice the energetic cost of stair descent (Teh & Azis, 2002). Less frequent stair climbing than descent was evident in both countries, consistent with the differences in energetic cost of the two directions of travel (c.f. tables 1 and 4 in the main text). These negative effects of descending elevators on stair climbing may reflect the greater reluctance to climb than descend when a mechanised alternative will be available.

## References

- Blake H, Lee S, Stanton T, Gorely T. Workplace intervention to promote stair-use in an NHS setting. *Int J Workplace Health Manag* 2008; 1:162-75.
- Eves FF. All choices are not equal; Effects of context on point-of-choice prompts for stair climbing. *Obes Rev* 2008; 9:83-4.
- Eves FF. Point-of-decision prompts to increase stair use. *Am J Prev Med* 2010; 38:573-4.
- Eves FF, Lewis AL, Griffin C. Modeling effects of stair width on rates of stair climbing in a train station. *Prev Med* 2008; 47:270-2.
- Eves FF, Olander EK, Nicoll G, Puig-Ribera A, Griffin C. Increasing stair climbing in a train station; effects of contextual variables and visibility. *J Envir Psychol.* 2009;29:300-03.
- Eves FF, Olander EK, Webb OJ, Griffin C, Chambers J. Likening stairs in buildings to climbing a mountain: self-reports of expected effects on stair climbing and objective measures of effectiveness. *Psychol Sport Exerc* 2012a; 13:170-6.
- Eves FF, Webb OJ, Mutrie N. A workplace intervention to promote stair climbing: greater effects in the overweight. *Obes* 2006; 14:2210-16.
- Gärling T, Gärling E. Distance minimization in downtown pedestrian shopping. *Environ Plan A.* 1988;20:547-554.
- Kerr J, Eves F, Carroll D. Can posters prompt stair use in a worksite environment? *J Occup Health* 2001a; 43:205-7.
- Kerr J, Eves FF, Carroll D. Getting more people on the stairs: The impact of a new message format. *J Health Psychol.* 2001b;6:495-500.
- Olander EK, Eves FF. Elevator availability and its impact on stair use in a workplace. *J Envir Psychol* 2011a; 31:200-6.
- Srinivasan M. Optimal speed for walking and running, and walking on a moving walkway. *Chaos.* 2009; 19:026112 1-10.
- Teh KC, Aziz AR. Heart rate, oxygen uptake, and energy cost of ascending and descending the stairs. *Med Sci Sports Exerc* 2002; 34:695-9.

Thomas EL, Puig Ribera A, Senye-Mir A, Greenfield S, Eves FF. Testing messages to promote stair climbing at work.

*Int J Workplace Health Manag* 2015; 8:189-205.

Webb OJ, Eves FF. Effects of environmental changes in a stair climbing intervention: generalization to stair descent.

*Am J Health Prom.* 2007;**22**:38-44.
